# Supplementary material for: Differences in metalloproteinases and their tissue inhibitors in the cerebrospinal fluid are associated with delirium
Source: PubMed Central journal article supplement (PMC11211460; doi:10.1038/s43856-024-00558-z), 2024-06-27
Supplement: 43856_2024_558_MOESM3_ESM.pdf [file 43856_2024_558_MOESM3_ESM.pdf]

## **Description of additional supplementary files**

File name: Supplementary Data 1

File description: Numerical data underlying Figure 1 (Sheet 1) and Figure 2 (Sheet 2) are provided as supplementary data.
